# Supplementary material
Source: publisher figshare collection journal article supplement (https://karger.figshare.com/articles/dataset/_/13502478)
Supplement: Supplementary file 1 [file 1]

## Inclusion and exclusion of patients by case definition

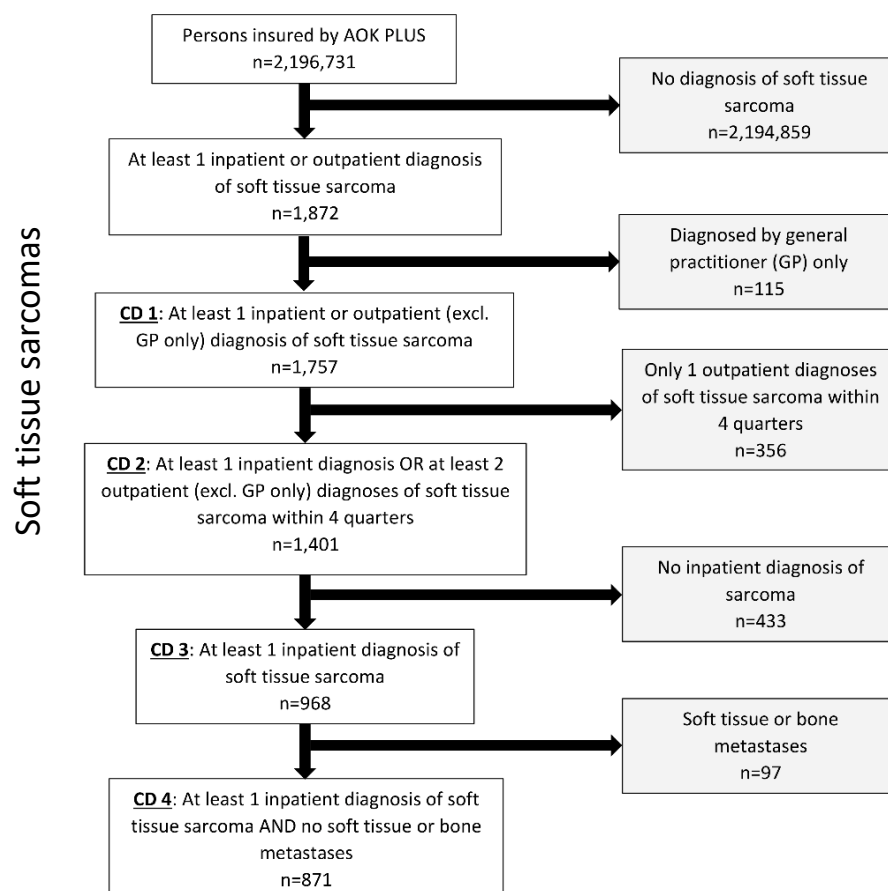

Figure S1: Flow chart for patients with soft tissue sarcoma
