# Supplementary material
Source: publisher figshare collection journal article supplement (https://karger.figshare.com/articles/dataset/_/13502478)
Supplement: Supplementary file 2 [file 1]

## **Supplementary material**

### **Medical care and survival of soft tissue and bone sarcoma patients: Results and methodological aspects of a German sub-national cohort study based on administrative healthcare data**

Olaf Schoffer<sup>1</sup>, Martin Roessler<sup>1</sup>, Thomas Datzmann<sup>1</sup>, Dimosthenis Andreou<sup>2</sup>, Jens Jakob<sup>3</sup>,  
Martin Eichler<sup>4</sup>, Stephan Richter<sup>5</sup>, Markus Schuler<sup>6</sup>, Jochen Schmitt<sup>1</sup>

#### **Therapies**

##### **Radiotherapy**

OPS codes: 8-52, 8-53

GO codes: 25310, 25320, 25321, 25322, 25323, 25330

##### **Chemotherapy/Immunotherapy**

OPS codes: 8-54

##### Chemotherapy

ATC codes: L01AA01, L01AA03, L01AA06, L01AA09, L01AB02, L01AX03, L01AX04, L01BA01, L01BA04, L01BB05, L01BC02, L01BC03, L01BC05, L01BC07, L01CA01, L01CA02, L01CA04, L01CA05, L01CB01, L01CD01, L01CD02, L01CD04, L01CX01, L01DB01, L01DB03, L01DB07, L01DC01, L01DC03, L01XA01, L01XA02, L01XA03, L01XX17, L01XX19, L01XX32, L01XX41

##### Immunotherapy

ATC codes: L01XC02, L01XC03, L01XC06, L01XC07, L01XC08, L01XC09, L01XC11, L01XC13, L01XC14, L01XC17, L01XC21, L01XC23, L01XE09, L04AA17, L04AA23, L04AB02, L04AB04

#### **Surgery**

##### Both soft tissue and bone sarcoma

OPS codes: 5-212, 5-343, 5-347, 5-541, 5-782, 5-822, 5-829, 5-838, 5-852, 5-895, 5-015, 5-181, 5-302, 5-325, 5-403, 5-454, 5-512, 5-521, 5-524, 5-541, 5-547, 5-590, 5-622, 5-642, 5-852, 5-895, 5-901, 5-98c

GO codes: 07320, 07345, 31132, 31133, 31152, 36122, 36123, 36126, 36154

Soft tissue sarcoma only

OPS codes: 5-06, 5-859.3

Bone sarcoma only

OPS codes: 5-016, 5-770, 5-780, 5-782, 5-830, 5-832

### **Comorbidities (ICD-10-GM codes)**

Hypertension: I10  
Angina pectoris: I20  
Heart failure: I50  
PAVC: I73.9  
Thrombosis: I80  
COPD: J44  
Bronchial asthma: J45  
Diabetes 2: E11  
Obesity: E65, E66  
Crohn's disease: K50  
Colitis ulcerosa: K51  
Chronic polyarthritis: M05, M06  
Back pain: M54  
Arthrosis: M15 to M19  
Depression: F32, F33, F34  
Anxiety disorders: F40, F41  
Adjustment problems: F43  
Addictions: F10 to F19  
Dementia: G30, F00, F01, F02, F03, G31.0, G23.1, F05.1, G31.82

### **Secondary oncological diseases (ICD-10-GM codes)**

Mouth: C00 to C14  
Digestive organs: C15 to C26  
Respiratory organs: C30 to C39  
Skin: C43 to C44  
Soft tissue: C45 to C49  
Mammary gland: C50  
Female genital organs: C51 to C58  
Male genital organs: C60 to C63  
Urinary organs: C64 to C68  
Eye/Brain/CNS: C69 to C72  
Thyroid gland: C73 to C75  
Primary tumor: C97
