# Supplementary material
Source: publisher figshare collection journal article supplement (https://karger.figshare.com/articles/dataset/_/13502478)

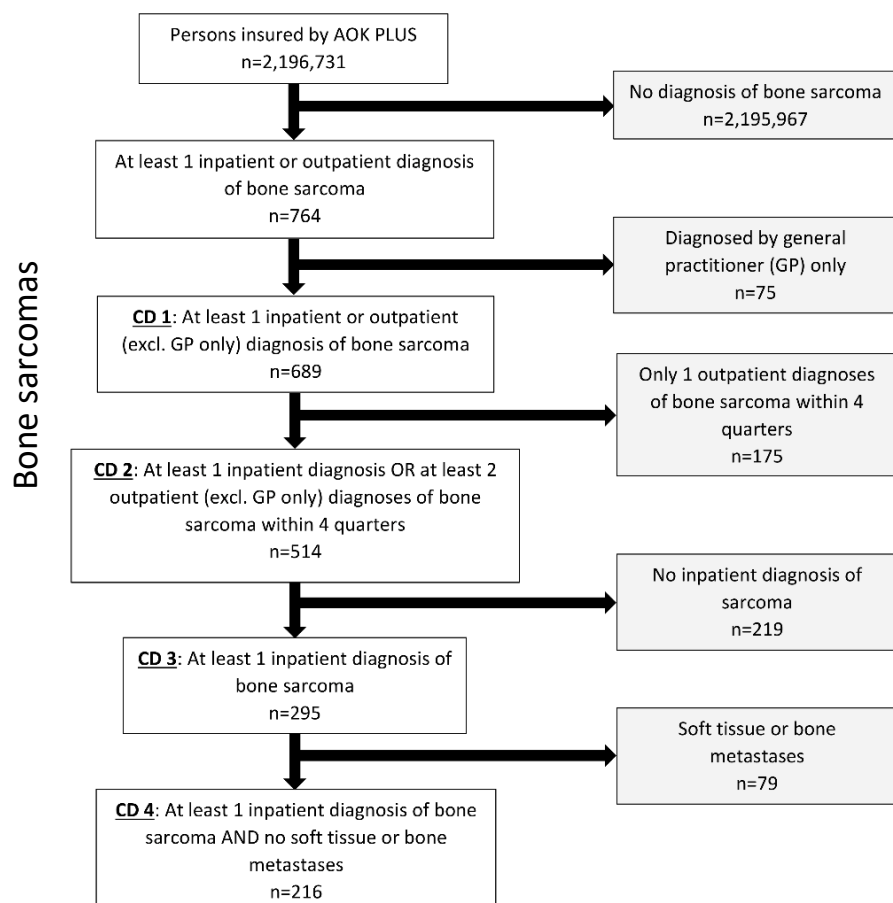

Figure S2: Flow chart for patients with bone sarcoma

Supplement: Supplementary file 3 [file 1]
